# Supplementary material
Source: PubMed Central journal article supplement (PMC5290816)
Supplement: EMBR-17-202-s001.pdf [file EMBR-17-202-s001.pdf]

## **Contents**

1. Appendix Table S1
2. Appendix Table S2
3. Appendix Table S3

**Appendix Table S1. Calculated parameters derived from FRAP analysis of ChAPs at the TGN and in the cytoplasm in  $\Delta chs5$  strain background.** The mean  $\pm$  SEM is shown for diffusion coefficient  $D_f$  and immobile fraction  $F_{im}$ . For the detailed calculation procedures see Materials and Methods section.

| Analyzed protein | Strain background | $D_f$ ( $\mu\text{m}^2 \cdot \text{s}^{-1}$ ) |                   | $F_{im}$ (%)  |               |
|------------------|-------------------|-----------------------------------------------|-------------------|---------------|---------------|
|                  |                   | TGN                                           | cytoplasm         | TGN           | cytoplasm     |
| <b>Chs6 GFP</b>  | $\Delta chs5$     | 0.110 $\pm$ 0.008                             | 0.325 $\pm$ 0.030 | 0.5 $\pm$ 1.2 | 4.9 $\pm$ 1.4 |
| <b>Bud7 GFP</b>  | $\Delta chs5$     | 0.095 $\pm$ 0.009                             | 0.182 $\pm$ 0.015 | 1.4 $\pm$ 1.6 | 4.5 $\pm$ 1.4 |
| <b>Bch1 GFP</b>  | $\Delta chs5$     | 0.145 $\pm$ 0.011                             | 0.269 $\pm$ 0.029 | 2.2 $\pm$ 1.4 | 3.2 $\pm$ 0.1 |
| <b>Bch2 GFP</b>  | $\Delta chs5$     | 0.140 $\pm$ 0.020                             | 0.234 $\pm$ 0.020 | 6.6 $\pm$ 2.0 | 3.8 $\pm$ 1.5 |

**Appendix Table S2. Colocalization analysis of Chs5 GFP with the TGN marker Sec7 DsRed.** The mean  $\pm$  SD is shown.

| Analyzed protein | Strain background                | Manders coefficients |                     |
|------------------|----------------------------------|----------------------|---------------------|
|                  |                                  | M1-<br>Green to Red  | M2-<br>Red to Green |
| Chs5 GFP         | WT                               | 0.81 $\pm$ 0.11      | 0.86 $\pm$ 0.06     |
|                  | <i>CHS6</i> $\Delta\Delta\Delta$ | 0.22 $\pm$ 0.07      | 0.70 $\pm$ 0.02     |
|                  | <i>BUD7</i> $\Delta\Delta\Delta$ | 0.38 $\pm$ 0.07      | 0.85 $\pm$ 0.10     |
|                  | <i>BCH1</i> $\Delta\Delta\Delta$ | 0.87 $\pm$ 0.07      | 0.85 $\pm$ 0.06     |
|                  | <i>BCH2</i> $\Delta\Delta\Delta$ | 0.34 $\pm$ 0.07      | 0.76 $\pm$ 0.11     |
|                  | $\Delta\Delta\Delta\Delta$       | 0.40 $\pm$ 0.09      | 0.82 $\pm$ 0.11     |

**Appendix Table S3. Strains used in the study**

| Strain number | Designation                        | Genotype and mutations                                                                  | Source                    |
|---------------|------------------------------------|-----------------------------------------------------------------------------------------|---------------------------|
| YPH499        |                                    | <i>MAT a ade2 his3 leu2 lys1 trp1 ura3</i>                                              | Sikorski and Hieter, 1989 |
| YPH500        |                                    | <i>MAT α ade2 his3 leu2 lys1 trp1 ura3</i>                                              | Sikorski and Hieter, 1989 |
| YAS431        | <i>Δchs5</i>                       | <i>chs5::LEU2</i>                                                                       | Trautwein et al. 2006     |
| YAS563-2A     | <i>Δchs6</i>                       | <i>chs6::URA3</i>                                                                       | Trautwein et al. 2006     |
| YAS563-5A     | <i>Δbch1</i>                       | <i>bch1::HIS5</i>                                                                       | Trautwein et al. 2006     |
| YAS3302       | Chs5 GFP                           | <i>CHS5::CHS5-yEGFP(TRP1)</i>                                                           | This study                |
| YAS3303       | Chs6 GFP                           | <i>CHS6::CHS6-yEGFP(TRP1)</i>                                                           | This study                |
| YAS3304       | Bud7 GFP                           | <i>BUD7::BUD7-yEGFP(TRP1)</i>                                                           | This study                |
| YAS3305       | Bch1 GFP                           | <i>BCH1::BCH1-yEGFP(TRP1)</i>                                                           | This study                |
| YAS3306       | Bch2 GFP                           | <i>BCH2::BCH2-yEGFP(TRP1)</i>                                                           | This study                |
| YAS3859       | Chs6 GFP <i>Δchs5</i>              | <i>CHS6::CHS6-yEGFP(TRP1) chs5::URA3</i>                                                | This study                |
| YAS3864       | Bud7 GFP <i>Δchs5</i>              | <i>BUD7::BUD7-yEGFP(TRP1) chs5::URA3</i>                                                | This study                |
| YAS3865       | Bch1 GFP <i>Δchs5</i>              | <i>BCH1::BCH1-yEGFP(TRP1) chs5::URA3</i>                                                | This study                |
| YAS3866       | Bch2 GFP <i>Δchs5</i>              | <i>BCH2::BCH2-yEGFP(TRP1) chs5::URA3</i>                                                | This study                |
| YAS3315       | Cop1 GFP                           | <i>COP1::COP1-yEGFP(TRP1)</i>                                                           | This study                |
| YAS3839       | Sec28 GFP                          | <i>SEC28::SEC28-yEGFP(TRP1)</i>                                                         | This study                |
| YAS3842       | Clc1 GFP                           | <i>CLC1::CLC1-yEGFP(TRP1)</i>                                                           | This study                |
| YAS3843       | Apm1 GFP                           | <i>APM1::APM1-yEGFP(TRP1)</i>                                                           | This study                |
| YAS328        | Chs6 9myc                          | <i>CHS6::CHS6-9myc(TRP1)</i>                                                            | Trautwein et al. 2006     |
| YAS339        | Bch1 9myc                          | <i>BCH1::BCH1-9myc(TRP1)</i>                                                            | Trautwein et al. 2006     |
| YAS589        | Bch2 9myc                          | <i>BCH2::BCH2-9myc(TRP1)</i>                                                            | Trautwein et al. 2006     |
| YAS4143       | Chs5 GFP <i>ΔΔΔΔ</i>               | <i>CHS5::CHS5-yEGFP(TRP1) chs6::URA3 bch2::kanMX bch1::HIS5 bud7::natNT2</i>            | This study                |
| YAS4361       | Chs5 GFP <i>CHS6 ΔΔΔ</i>           | <i>CHS5::CHS5-yEGFP(TRP1) bch1::HIS5 bud7::URA3 bch2::natNT2</i>                        | This study                |
| YAS4137       | Chs5 GFP <i>BUD7 ΔΔΔ</i>           | <i>CHS5::CHS5-yEGFP(TRP1) chs6::URA3 bch2::kanMX bch1::HIS5</i>                         | This study                |
| YAS4544       | Chs5 GFP <i>BCH1 ΔΔΔ</i>           | <i>CHS5::CHS5-yEGFP(TRP1) bud7::URA3 chs6::HIS5 bch2::natNT2</i>                        | This study                |
| YAS4134       | Chs5 GFP <i>BCH2 ΔΔΔ</i>           | <i>CHS5::CHS5-yEGFP(TRP1) bud7::URA3 chs6::HIS5 bch1::natNT2</i>                        | This study                |
| YAS4368       | Chs5 GFP <i>GPD-BCH2 ΔΔΔ</i>       | <i>CHS5::CHS5-yEGFP(TRP1) BCH2::GPD(kanMX4)-BCH2 bud7::URA3 chs6::HIS5 bch1::natNT2</i> | This study                |
| YAS4159       | Chs5 GFP <i>GPD-CHS6 ΔΔΔ</i>       | <i>CHS5::CHS5-yEGFP(TRP1) CHS6::GPD(kanMX4)-CHS6 bud7::URA3 bch2::HIS5 bch1::natNT2</i> | This study                |
| YAS4513       | Chs5 GFP <i>CHS6(PSSF) ΔΔΔ</i>     | <i>CHS5::CHS5-yEGFP(TRP1) bch2::HIS5 bch1::hphNTI CHS6::CHS6(PSSF) bud7::URA3</i>       | This study                |
| YAS4512       | Chs5 GFP <i>CHS6(PSSF) BUD7 ΔΔ</i> | <i>CHS5::CHS5-yEGFP(TRP1) bch2::HIS5 bch1::hphNTI CHS6::CHS6(PSSF)</i>                  | This study                |
| YAS4129       | Chs5 GFP <i>CHS6 BUD7 ΔΔ</i>       | <i>CHS5::CHS5-yEGFP(TRP1) bch2::HIS5 bch1::natNT2</i>                                   | This study                |
| YAS4356       | Chs5 GFP <i>CHS6 BCH2 ΔΔ</i>       | <i>CHS5::CHS5-yEGFP(TRP1) bch1::HIS5 bud7::URA3</i>                                     | This study                |
| YAS3871       | Chs6 GFP <i>ΔΔΔ</i>                | <i>CHS6::CHS6-yEGFP(TRP1) bch2::HIS5 bud7::URA3 bch1::natNT2</i>                        | This study                |

|         |                                                |                                                                                        |                       |
|---------|------------------------------------------------|----------------------------------------------------------------------------------------|-----------------------|
| YAS4349 | GPD-Chs6 GFP $\Delta\Delta\Delta$              | <i>CHS6::GPD(kanMX4)-CHS6-yEGFP(TRP1) bch2::HIS5 bud7::URA3 bch1::natNT2</i>           | This study            |
| YAS653  | Chs6 9myc $\Delta\Delta\Delta$                 | <i>CHS6::CHS6-9myc(TRP1) bud7::LEU2 bch2::kanMX bch1::HIS5</i>                         | Trautwein et al. 2006 |
| YAS4161 | GPD-Chs6 9myc $\Delta\Delta\Delta$             | <i>CHS6::GPD(natNT2)-CHS6-9myc(TRP1) bud7::LEU2 bch2::kanMX bch1::HIS5</i>             | This study            |
| YAS3890 | Bud7 GFP $\Delta\Delta\Delta$                  | <i>BUD7::BUD7-yEGFP(TRP1) chs6::URA3 bch2::kanMX bch1::HIS5</i>                        | This study            |
| YAS3872 | Bch1 GFP $\Delta\Delta\Delta$                  | <i>BCH1::BCH1-yEGFP(TRP1) bud7::URA3 chs6::HIS5 bch2::kanMX</i>                        | This study            |
| YAS3883 | Bch2 GFP $\Delta\Delta\Delta$                  | <i>BCH2::BCH2-yEGFP(TRP1) bud7::URA3 bch1::HIS5 chs6::natNT2</i>                       | This study            |
| YAS4500 | GPD-Bch2 GFP $\Delta\Delta\Delta$              | <i>BCH2::GPD(kanMX4)-BCH2-yEGFP(TRP1) bud7::URA3 bch1::HIS5 chs6::natNT2</i>           | This study            |
| YAS654  | Bch2 9-myc $\Delta\Delta\Delta$                | <i>BCH2::BCH2-9myc (TRP1) chs6::URA3 bud7::LEU2 bch1::HIS5</i>                         | Trautwein et al. 2006 |
| YAS4499 | GPD-Bch2 9-myc $\Delta\Delta\Delta$            | <i>BCH2::GPD(natNT2)-BCH2-9myc (TRP1) chs6::URA3 bud7::LEU2 bch1::HIS5</i>             | This study            |
| YAS3879 | Bch1 GFP <i>CHS6</i> $\Delta\Delta$            | <i>BCH1::BCH1-yEGFP(TRP1) bud7::URA3 bch2::kanMX</i>                                   | This study            |
| YAS3904 | Bch1 GFP <i>BUD7</i> $\Delta\Delta$            | <i>BCH1::BCH1-yEGFP(TRP1) bch2::HIS5 chs6::kanMX</i>                                   | This study            |
| YAS3851 | Bch1 GFP <i>BCH2</i> $\Delta\Delta$            | <i>BCH1::BCH1-yEGFP(TRP1) bud7::URA3 chs6::HIS5</i>                                    | This study            |
| YAS921  | Chs3 GFP                                       | <i>CHS3::CHS3-yEGFP(kanMX4)</i>                                                        | Trautwein et al. 2006 |
| YAS4351 | Chs3 GFP GPD- <i>BCH1</i>                      | <i>CHS3::CHS3-yEGFP(kanMX4) BCH1::GPD(natNT2)-BCH1</i>                                 | This study            |
| YAS4491 | Chs6 GFP GPD- <i>BCH1</i>                      | <i>CHS6::CHS6-yEGFP(TRP1) BCH1::GPD(natNT2)-BCH1</i>                                   | This study            |
| YAS4634 | Chs3 GFP <i>CHS6</i> $\Delta\Delta\Delta$      | <i>CHS3::CHS3-yEGFP(TRP1) bch1::HIS5 bud7::LEU2 bch2::kanMX</i>                        | This study            |
| YAS4638 | Chs3 GFP GPD- <i>CHS6</i> $\Delta\Delta\Delta$ | <i>CHS3::CHS3-yEGFP(TRP1) CHS6::GPD(natNT2)-CHS6 bch1::HIS5 bud7::LEU2 bch2::kanMX</i> | This study            |

---

*MAT  $\alpha$  ade2 his3 leu2 lys1 trp1 ura3*

|         |                           |                                                         |                       |
|---------|---------------------------|---------------------------------------------------------|-----------------------|
| YAS216  | Arf1 GFP                  | <i>ARF1::ARF1-yEGFP (kanMX4)</i>                        | This study            |
| YAS1905 | Pin2 GFP                  | <i>PIN2::PIN2-yEGFP (kanMX4)</i>                        | Ritz et al. 2014      |
| YAS4488 | Pin2 GFP GPD- <i>BCH1</i> | <i>PIN2::PIN2-yEGFP (kanMX4) BCH1::GPD(natNT2)-BCH1</i> | This study            |
| YAS576  | Bud7 9myc                 | <i>BUD7::BUD7-9myc (TRP1)</i>                           | Trautwein et al. 2006 |
| YAS601  | Chs5 9myc                 | <i>CHS5::CHS5-9myc (TRP1)</i>                           | This study            |
