# Supplementary material
Source: PubMed Central journal article supplement (PMC5290816)

Figure 8B

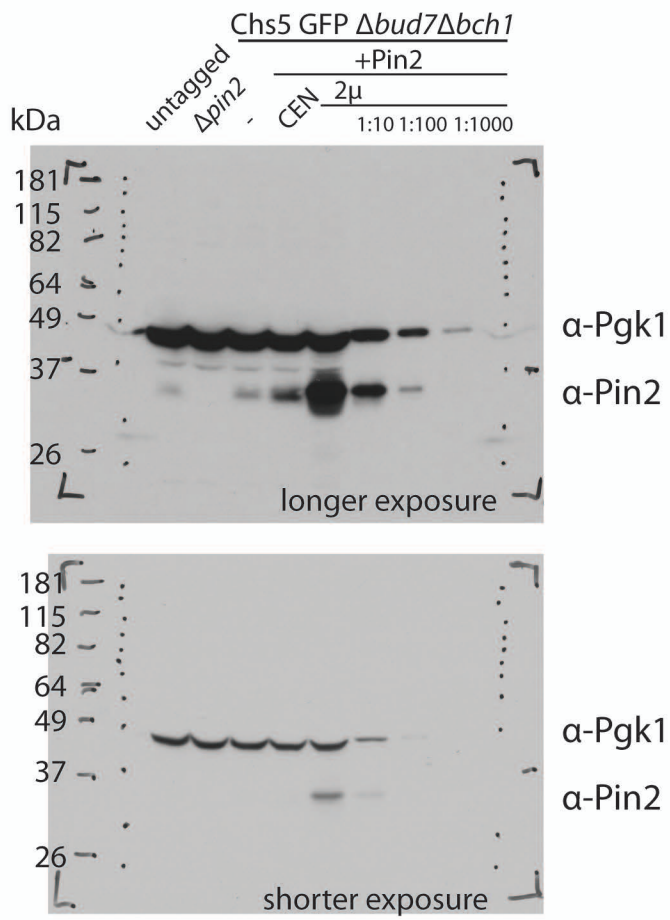

Supplement: EMBR-17-202-s004.pdf [file EMBR-17-202-s004.pdf]
